# Supplementary material for: MED1 Deficiency in Macrophages Accelerates Intimal Hyperplasia via ROS Generation and Inflammation
Source: Hindawi journal article supplement (doi:10.1155/2021/3010577), 2021-01-01
Supplement: f1 [file 3010577.f1.pdf]

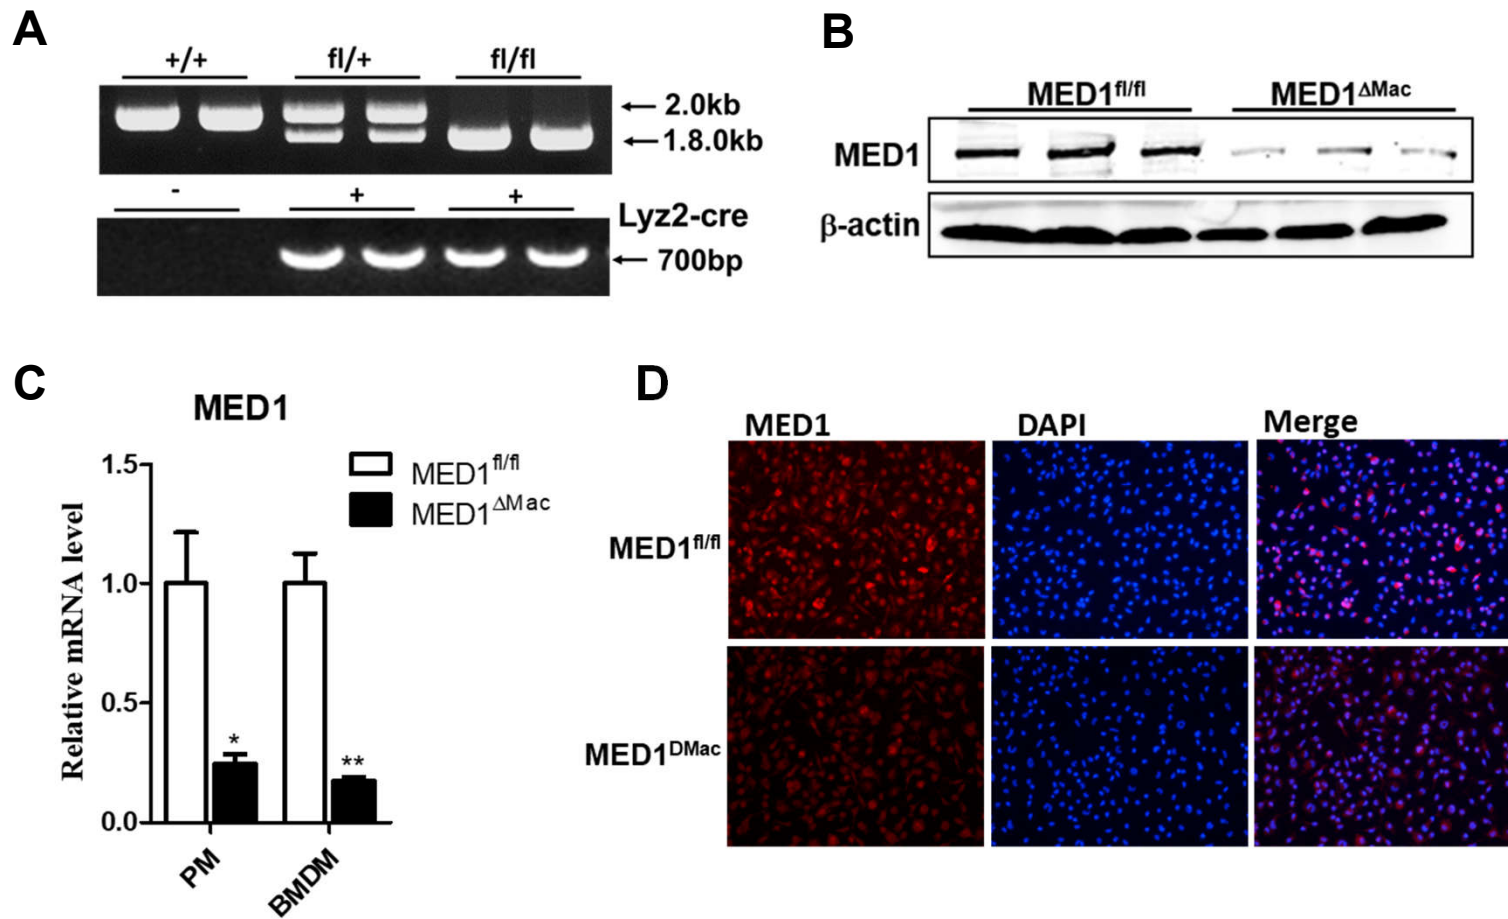

Supplementary figure S1

Supplementary figure S1. MED1(Mediator 1) expression was decreased in MED1<sup>ΔMac</sup> mice. (A) DNA electrophoresis, (B) Western blotting, (C) qRT-PCR, and (D) immunofluorescence staining was used to detect MED1 expression in MED1<sup>ΔMac</sup> and MED1<sup>fl/fl</sup> macrophages. PM, peritoneal macrophage; BMDM, bone marrow derived macrophage.

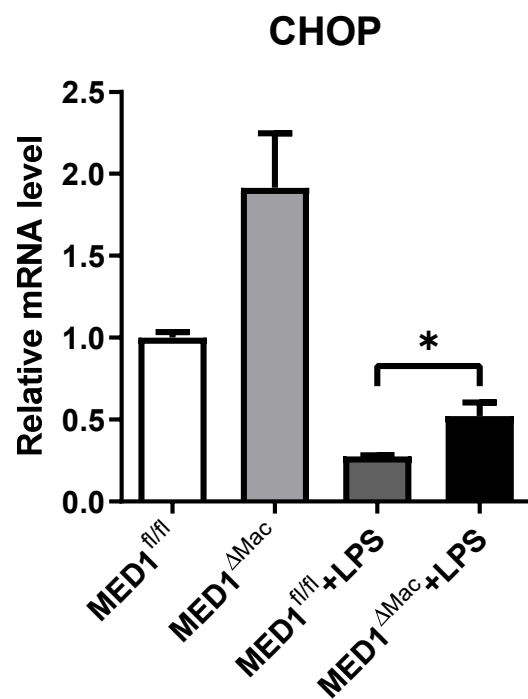

### Supplementary figure S2

Supplementary figure S2. MED1 (Mediator 1) deficiency promoted C/EBP homologous protein (CHOP) expression after lipopolysaccharide (LPS) treatment. qRT-PCR analysis of CHOP levels in peritoneal macrophages from MED1<sup>fl/fl</sup> or MED1<sup>ΔMac</sup> mice treated with LPS (50 ng/mL) for 6 hours.

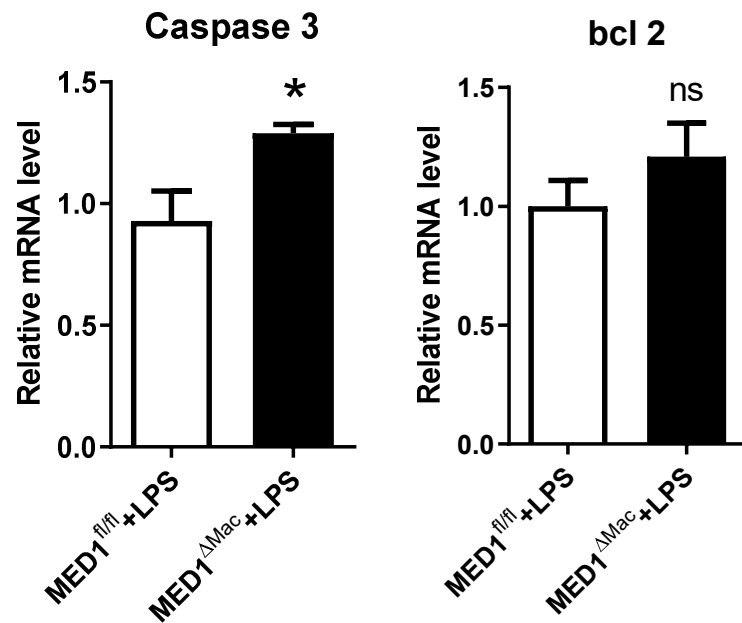

### Supplementary figure S3

Supplementary figure S3. MED1 (Mediator 1) deficiency promoted Caspase3 expression after lipopolysaccharide (LPS) treatment. qRT-PCR analysis of caspase 3 and B cell leukemia/lymphoma 2 (bcl2) levels in peritoneal macrophages from MED1<sup>fl/fl</sup> or MED1<sup>ΔMac</sup> mice treated with LPS (50 ng/mL) for 6 hours.

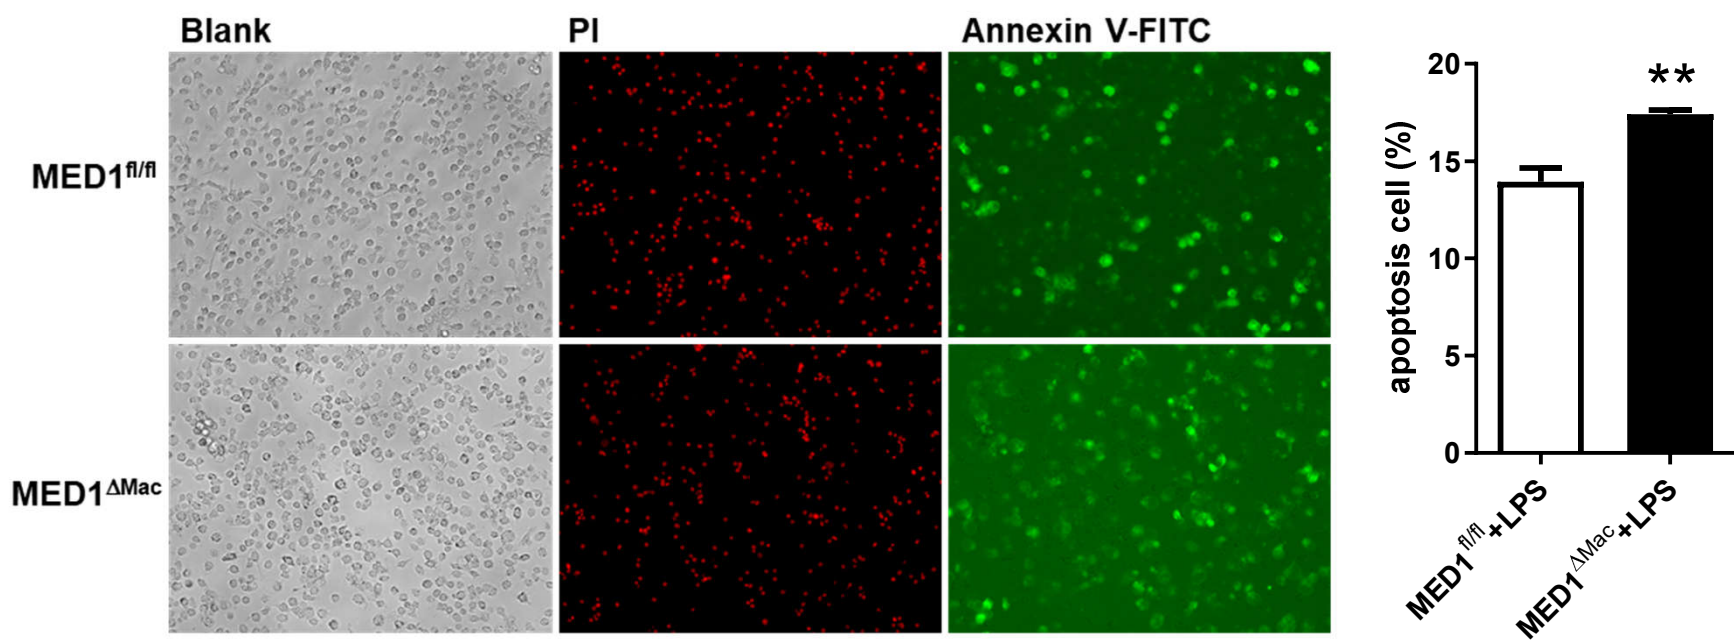

#### Supplementary figure S4

Supplementary figure S4. MED1 (Mediator 1) deficiency promoted apoptosis in macrophages after lipopolysaccharide (LPS) treatment. Apoptosis of peritoneal macrophages from  $MED1^{fl/fl}$  or  $MED1^{\Delta Mac}$  mice treated with LPS (50 ng/mL) for 24 hours as detected by Annexin V.

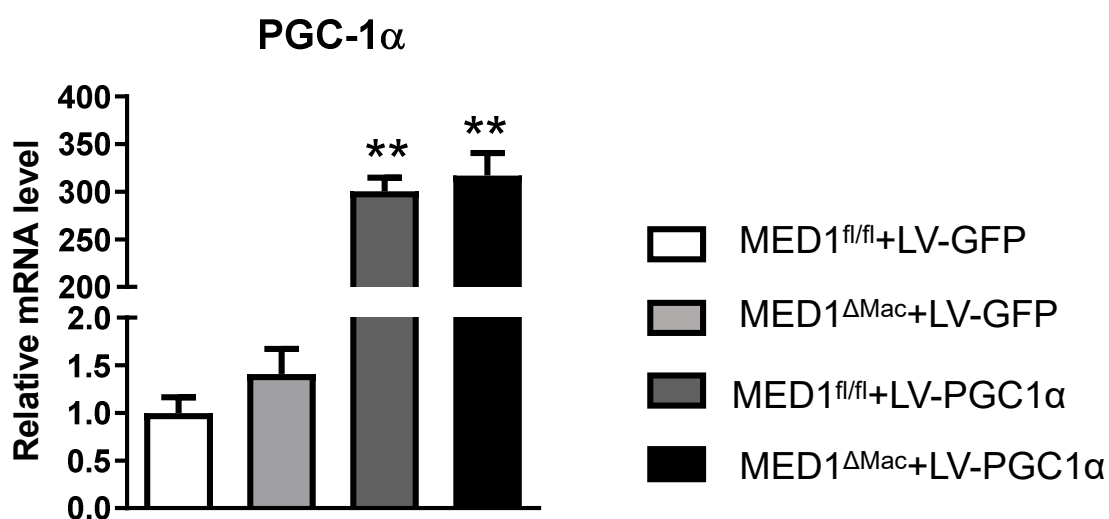

**Supplementary figure S5**

Supplementary figure S5. Macrophages overexpressing PGC1 $\alpha$  were constructed. qRT-PCR analysis of PGC1 $\alpha$  levels in peritoneal macrophages from MED1<sup>fl/fl</sup> or MED1<sup>ΔMac</sup> mice transfected with lentivirus carrying PGC1 $\alpha$  mRNA (LV- PGC1 $\alpha$ ) or control lentivirus (LV-GFP). PGC1 $\alpha$ , peroxisome proliferative activated receptor gamma coactivator 1 $\alpha$ .

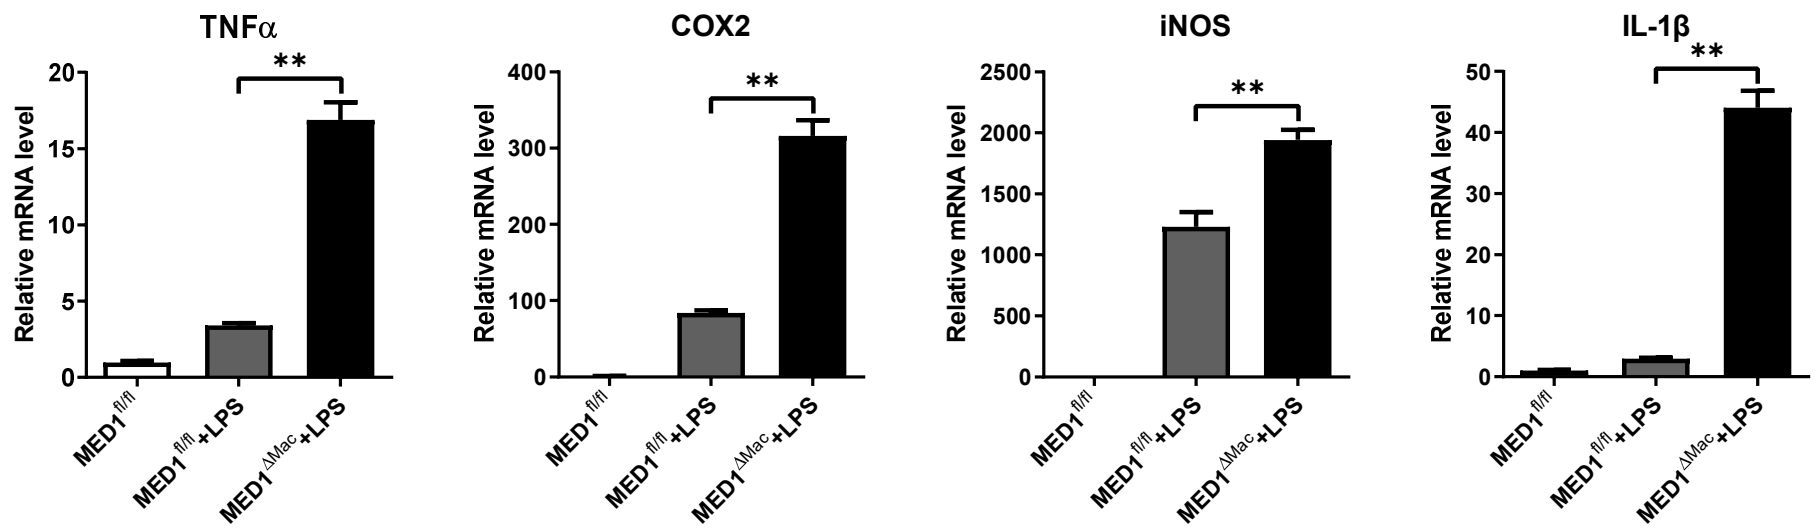

### Supplementary figure S6

Supplementary figure S6. MED1(Mediator 1) deficiency promoted TNF $\alpha$ , COX2, iNOS, and IL-1 $\beta$  expression after lipopolysaccharide (LPS) treatment. qRT-PCR analysis of TNF $\alpha$ , COX2, iNOS, and IL-1 $\beta$  levels in MED1<sup>fl/fl</sup> and MED1 $\Delta$ Mac macrophages treated with LPS. TNF $\alpha$ , tumor necrosis factor; COX2, cyclooxygenase 2; iNOS, inducible nitric oxide synthase; IL-1 $\beta$ , interleukin-1 $\beta$ .

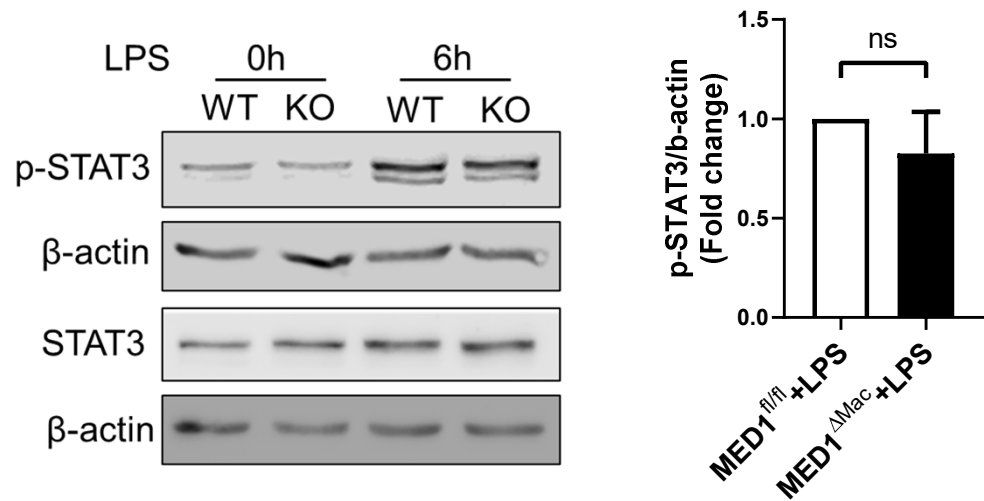

**Supplementary figure S7**

Supplementary figure S7. MED1 (Mediator 1) deficiency had no effect on STAT3 activation. Western blotting analysis of levels of phosphorylated STAT3 in peritoneal macrophages treated with lipopolysaccharide (LPS) for 6 hours. STAT3, signal transducer and activator of transcription 3.
